# Supplementary material for: MicroRNAs in Gingival Crevicular Fluid: An Observational Case-Control Study of Differential Expression in Periodontitis
Source: MDPI journal article supplement (doi:10.3390/ncrna9060073), 2023-11-18
Supplement: s1 [file s1]

## Supplementary Materials

**Table S1.** Descriptive analysis of the sample: tobacco and age.

|                              | Group   |                                           | Estadístico | Error estándar |
|------------------------------|---------|-------------------------------------------|-------------|----------------|
| Number<br>cigar-<br>rets/day | control | Mean                                      | 1.42        | 0.763          |
|                              |         | 95% Confidence In-<br>terval for the mean | Lower limit | -0.26          |
|                              |         |                                           | Upper limit | 3.10           |
|                              |         | Mean cropped at 5%                        | 1.19        |                |
|                              |         | Median                                    | 0.00        |                |
|                              |         | Variance                                  | 6.992       |                |
|                              |         | Standard deviation                        | 2.644       |                |
|                              |         | Minimum                                   | 0           |                |
|                              |         | Maximum                                   | 7           |                |
|                              |         | Range                                     | 7           |                |
|                              |         | Interquartile range                       | 3           |                |
|                              |         | Asymmetry                                 | 1.546       | 0.637          |
|                              |         | Kurtosis                                  | 0.781       | 1.232          |
|                              | case    | Mean                                      | 2.91        | 1.282          |
|                              |         | 95% confidence Inter-<br>val for the mean | Lower limit | 0.05           |
|                              |         |                                           | Upper limit | 5.77           |
|                              |         | Mean cropped at 5%                        | 2.68        |                |
|                              |         | Median                                    | 0.00        |                |
|                              |         | Variance                                  | 18.091      |                |
|                              |         | Standard deviation                        | 4.253       |                |
|                              |         | Minimum                                   | 0           |                |
|                              |         | Maximum                                   | 10          |                |
|                              |         | Range                                     | 10          |                |
|                              |         | Interquartile range                       | 7           |                |
|                              |         | Asymetry                                  | 0.982       | 0.661          |
|                              |         | Kurtosis                                  | -0.886      | 1.279          |
| AGE                          | control | Mean                                      | 50.17       | 2.121          |
|                              |         | 95% Confidence In-<br>terval for the mean | Lower limit | 45.50          |
|                              |         |                                           | Upper limit | 54.83          |
|                              |         | Mean cropped at 5%                        | 50.46       |                |
|                              |         | Median                                    | 50.50       |                |
|                              |         | Variance                                  | 53.970      |                |
|                              |         | Standard deviation                        | 7.346       |                |
|                              |         | Minimum                                   | 35          |                |
|                              |         | Maximum                                   | 60          |                |

|      |                                      |             |        |       |
|------|--------------------------------------|-------------|--------|-------|
| case | Range                                |             | 25     |       |
|      | Interquartile range                  |             | 10     |       |
|      | Asymetry                             |             | -0.651 | 0.637 |
|      | Kurtosis                             |             | 0.212  | 1.232 |
|      | Mean                                 |             | 46.36  | 2.980 |
|      | 95% Confidence Interval for the mean | Lower limit | 39.72  |       |
|      |                                      | Upper limit | 53.00  |       |
|      | Mean cropped at 5%                   |             | 46.07  |       |
|      | Median                               |             | 44.00  |       |
|      | Variance                             |             | 97.655 |       |
|      | Standard deviation                   |             | 9.882  |       |
|      | Minimum                              |             | 35     |       |
|      | Maximum                              |             | 63     |       |
|      | Range                                |             | 28     |       |
|      | Interquartile Range                  |             | 18     |       |
|      | Asymetry                             |             | 0.354  | 0.661 |
|      | Kurtosis                             |             | -1.193 | 1.279 |

**Table S2.** Descriptive analysis of the sample: sex.

|  |       | Frequency | Percentage | Valid Percentage | Cumulative Percentage |
|--|-------|-----------|------------|------------------|-----------------------|
|  | Man   | 4         | 33.3       | 33.3             | 33.3                  |
|  | Women | 8         | 66.7       | 66.7             | 100.0                 |
|  | Total | 12        | 100.0      | 100.0            |                       |

a. Control

|        |       | Frequency | Percentage | Valid Percentage | Cumulative Percentage |
|--------|-------|-----------|------------|------------------|-----------------------|
| Válido | man   | 3         | 27.3       | 27.3             | 27.3                  |
|        | women | 8         | 72.7       | 72.7             | 100.0                 |
|        | Total | 11        | 100.0      | 100.0            |                       |

a. Case

**Table S3.** Descriptive analysis of the sample: cigarrets/day.

|  |       | Frequency | Percentage | Valid Percentage | Cumulative Percentage |
|--|-------|-----------|------------|------------------|-----------------------|
|  | 0     | 7         | 63.6       | 63.6             | 63.6                  |
|  | 5     | 1         | 9.1        | 9.1              | 72.7                  |
|  | 7     | 1         | 9.1        | 9.1              | 81.8                  |
|  | 10    | 2         | 18.2       | 18.2             | 100.0                 |
|  | Total | 11        | 100.0      | 100.0            |                       |

a. Case

|  |       | Frequency | Percentage | Valid Percentage | Cumulative Percentage |
|--|-------|-----------|------------|------------------|-----------------------|
|  | 0     | 9         | 75.0       | 75.0             | 75.0                  |
|  | 4     | 1         | 8.3        | 8.3              | 83.3                  |
|  | 6     | 1         | 8.3        | 8.3              | 91.7                  |
|  | 7     | 1         | 8.3        | 8.3              | 100.0                 |
|  | Total | 12        | 100.0      | 100.0            |                       |

a. control

**Table S4.** Descriptive analysis of the sample: Age.

|     | Group   | N  | Mean  | Standard deviation | Standard error mean |
|-----|---------|----|-------|--------------------|---------------------|
| AGE | control | 12 | 50.17 | 7.346              | 2.121               |
|     | case    | 11 | 46.36 | 9.882              | 2.980               |

**Table S5.** Independent sample test: Age.

|     |                                         | Levene's test<br>for equality of<br>variances |       | T test for equality of means |        |                       |                      |                                |                                          |        |
|-----|-----------------------------------------|-----------------------------------------------|-------|------------------------------|--------|-----------------------|----------------------|--------------------------------|------------------------------------------|--------|
|     |                                         | F                                             | Sig.  | t                            | gl     | Sig. (bi-<br>lateral) | Mean dif-<br>ference | Standard er-<br>ror difference | 95% confidence inter-<br>val of the mean |        |
|     |                                         |                                               |       |                              |        |                       |                      |                                | Lower                                    | upper  |
| Age | Equal variances<br>are assumed          | 2.343                                         | 0.141 | 1.054                        | 21     | 0.304                 | 3.803                | 3.609                          | -3.703                                   | 11.309 |
|     | Equal variances<br>are not as-<br>sumed |                                               |       | 1.040                        | 18.404 | 0.312                 | 3.803                | 3.657                          | -3.868                                   | 11.474 |
